# Supplementary material for: A new estimator of heat periods for decadal climate predictions – a complex network approach
Source: Copernicus journal article supplement (doi:10.5194/npg-23-307-2016), 2016-08-24

Supplement of Nonlin. Processes Geophys., 23, 307–317, 2016  
<http://www.nonlin-processes-geophys.net/23/307/2016/>  
doi:10.5194/npg-23-307-2016-supplement  
© Author(s) 2016. CC Attribution 3.0 License.

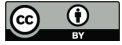

*Supplement of*

## **A new estimator of heat periods for decadal climate predictions – a complex network approach**

**Michael Weimer et al.**

*Correspondence to:* M. Weimer ([michael.weimer@kit.edu](mailto:michael.weimer@kit.edu))

The copyright of individual parts of the supplement might differ from the CC-BY 3.0 licence.

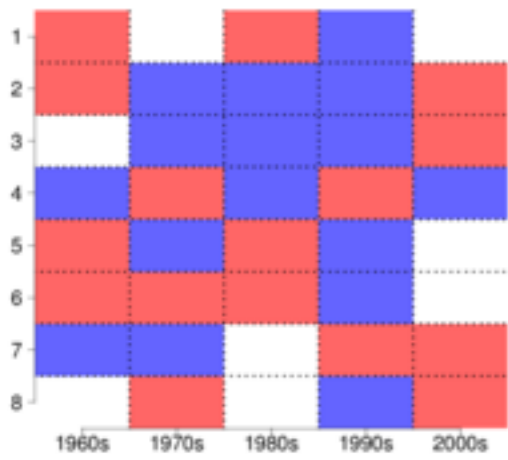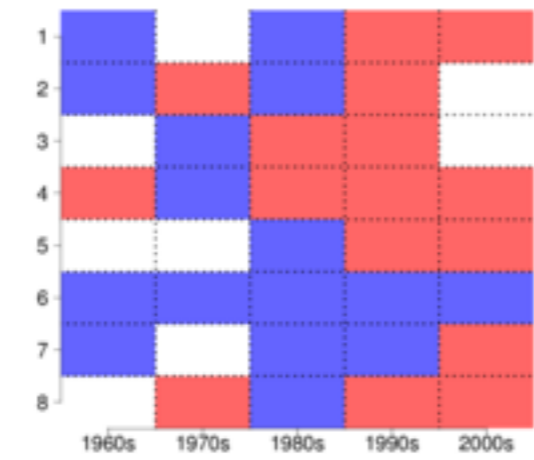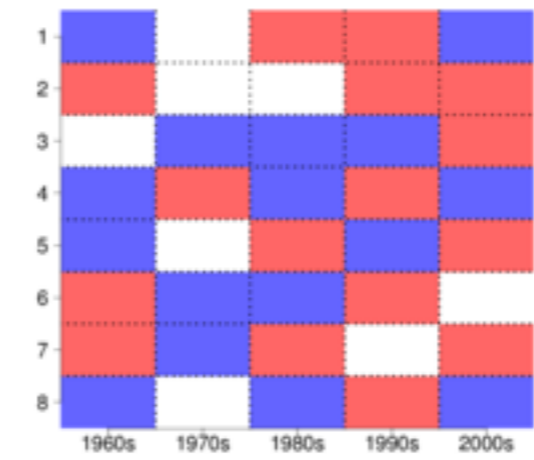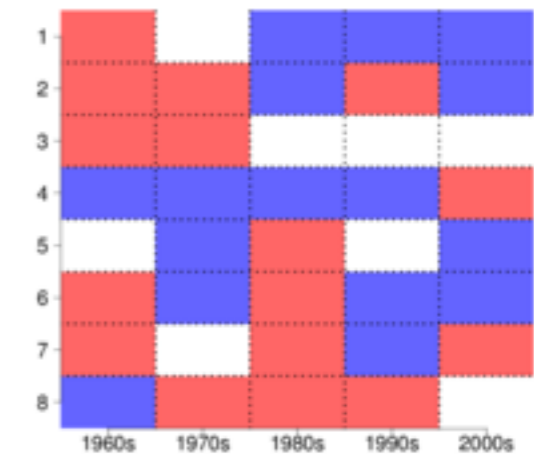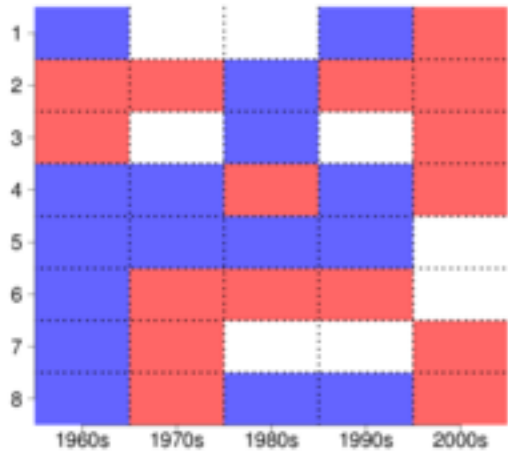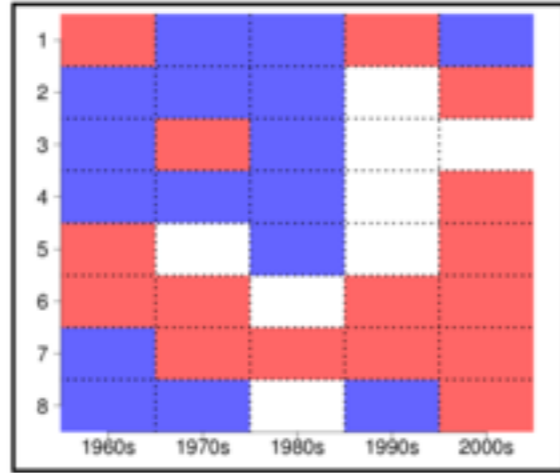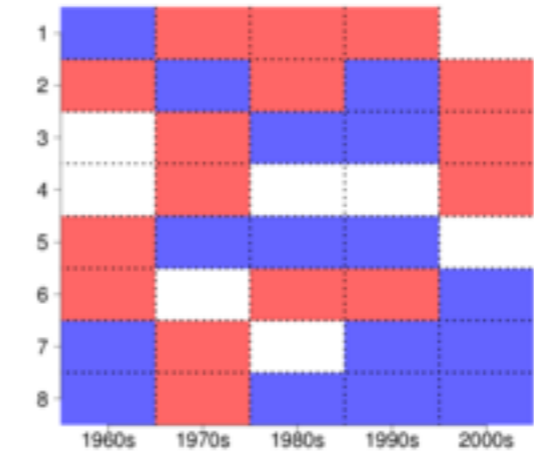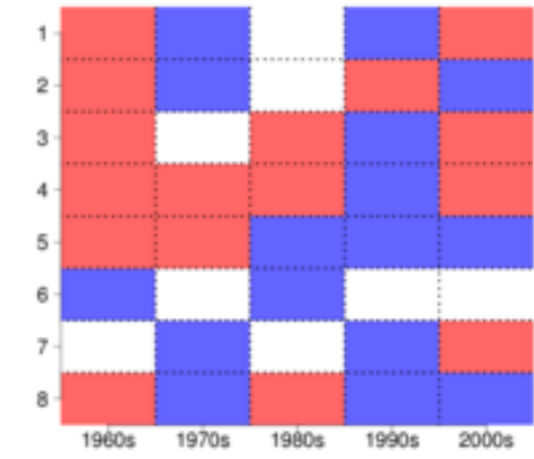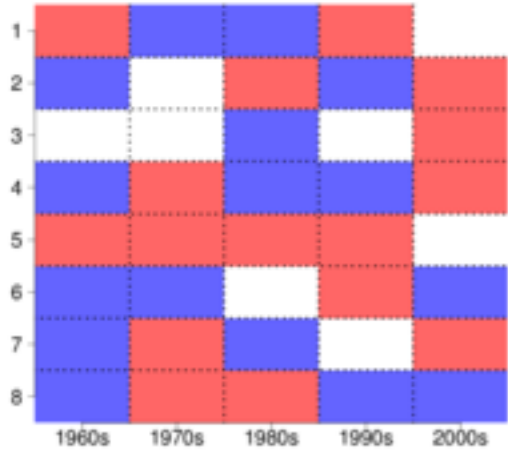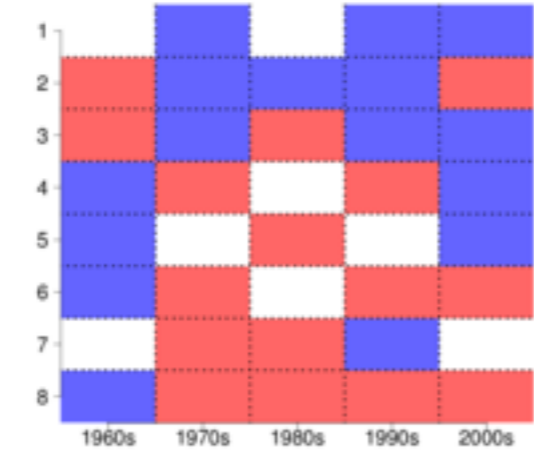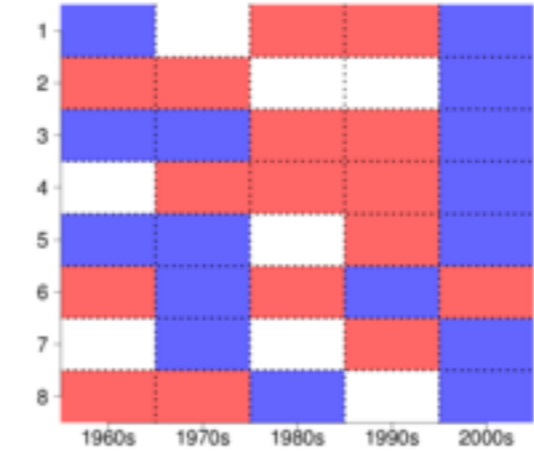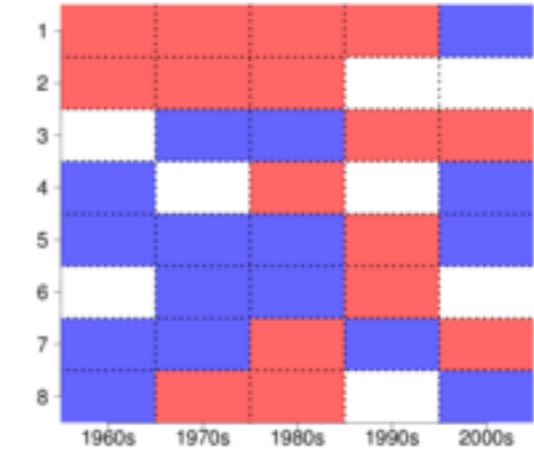

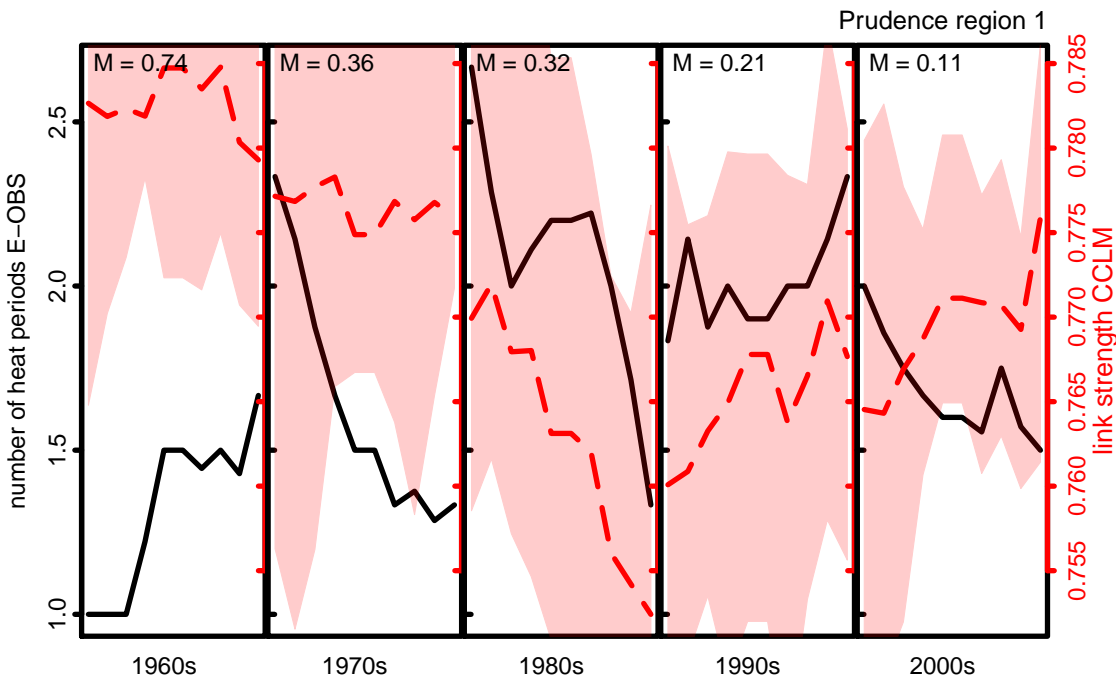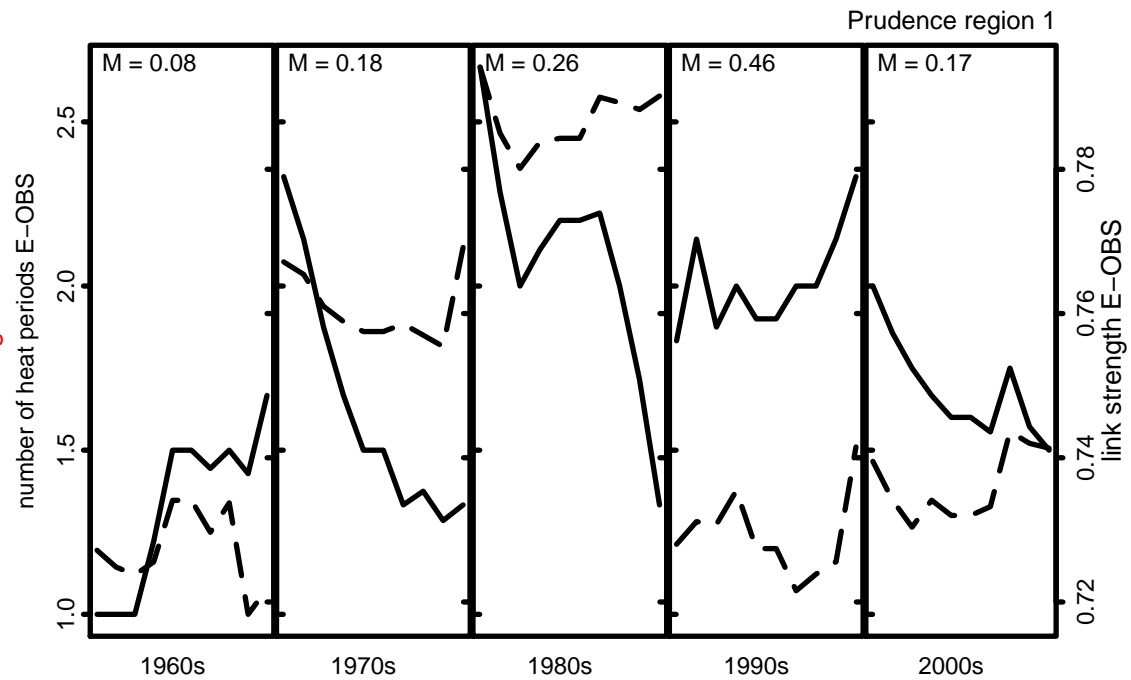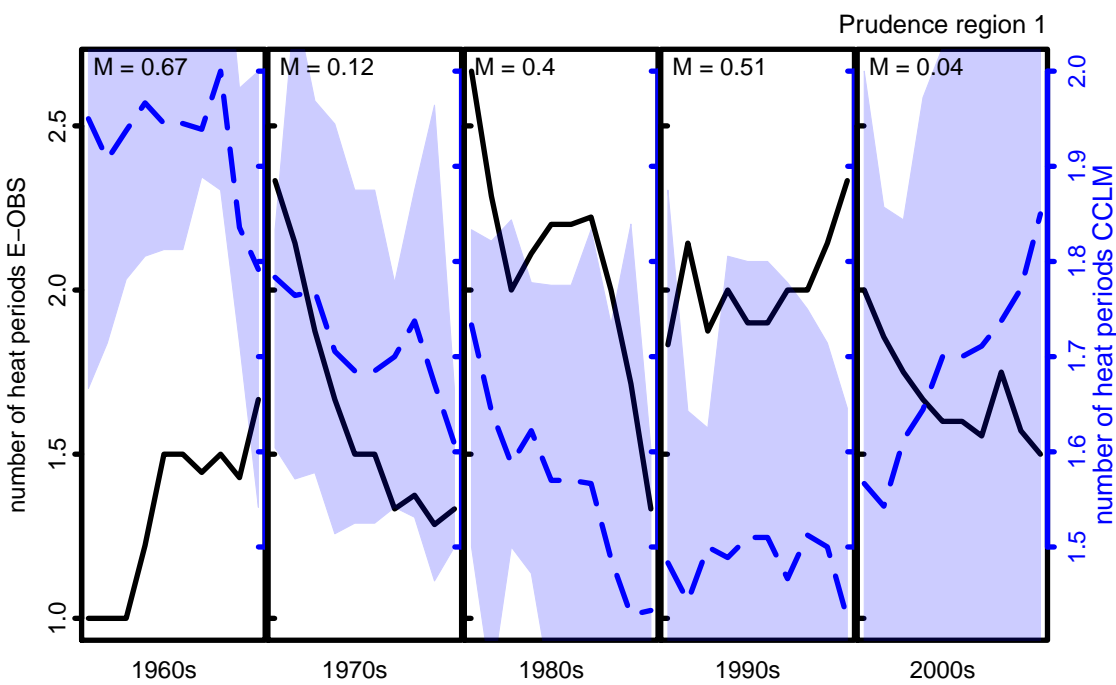

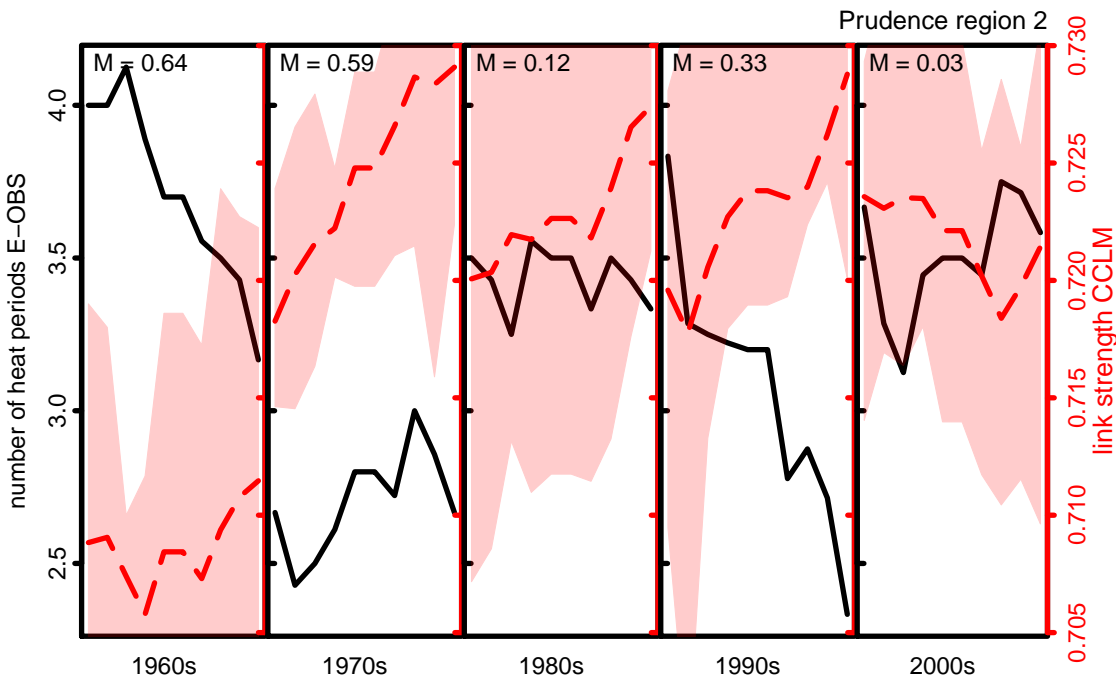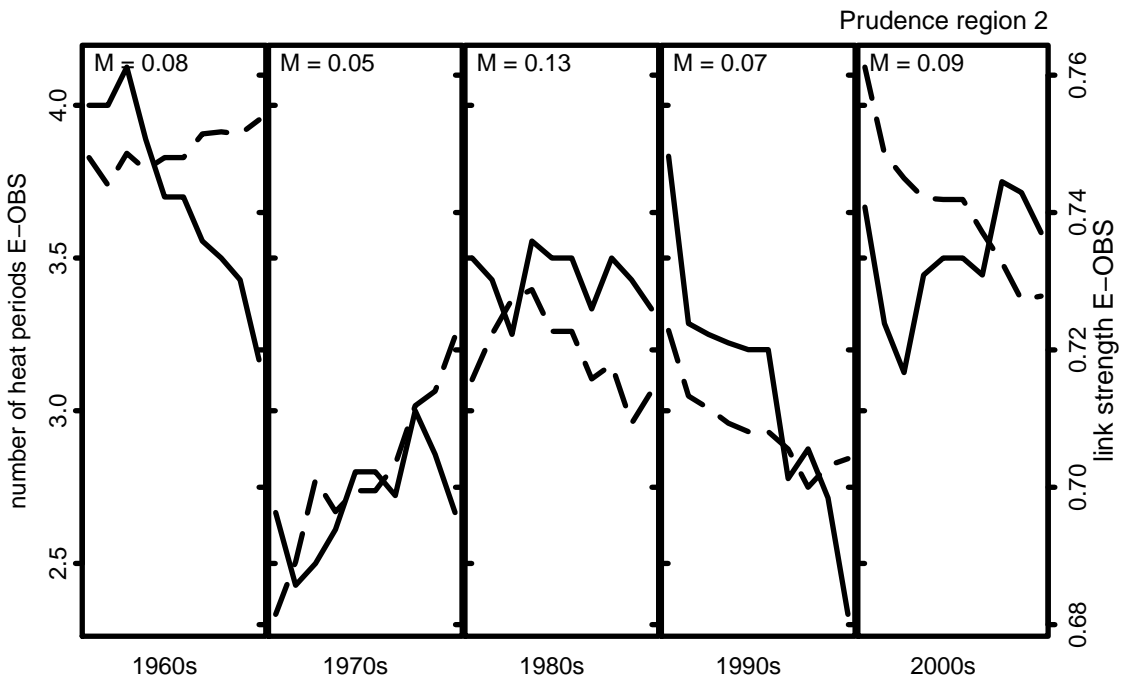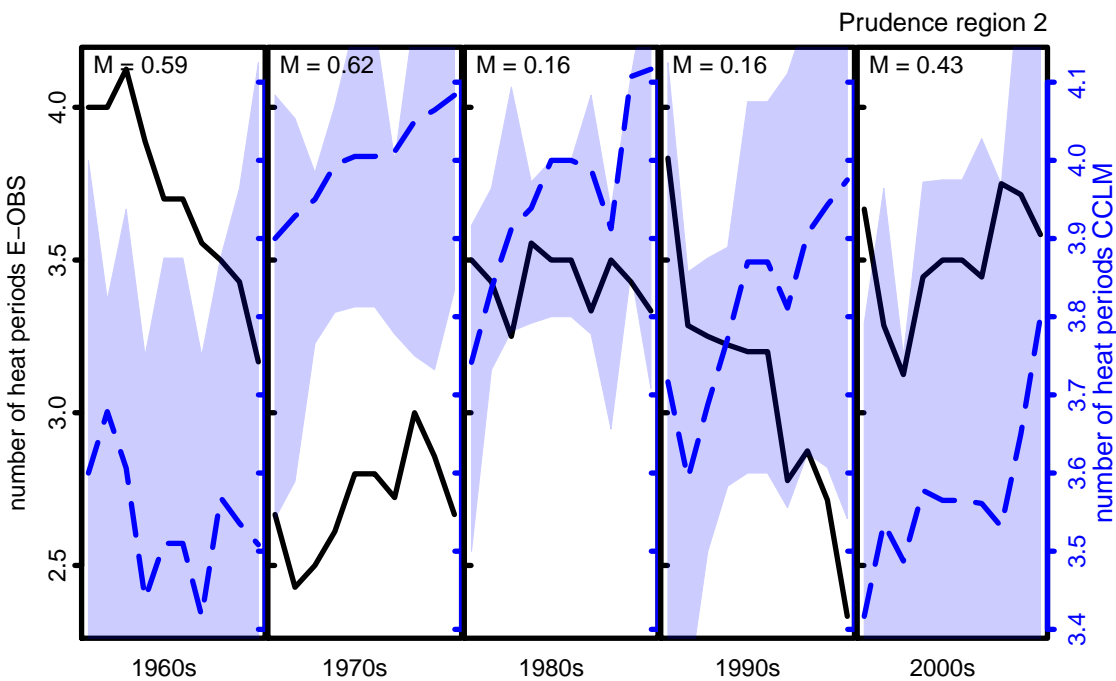

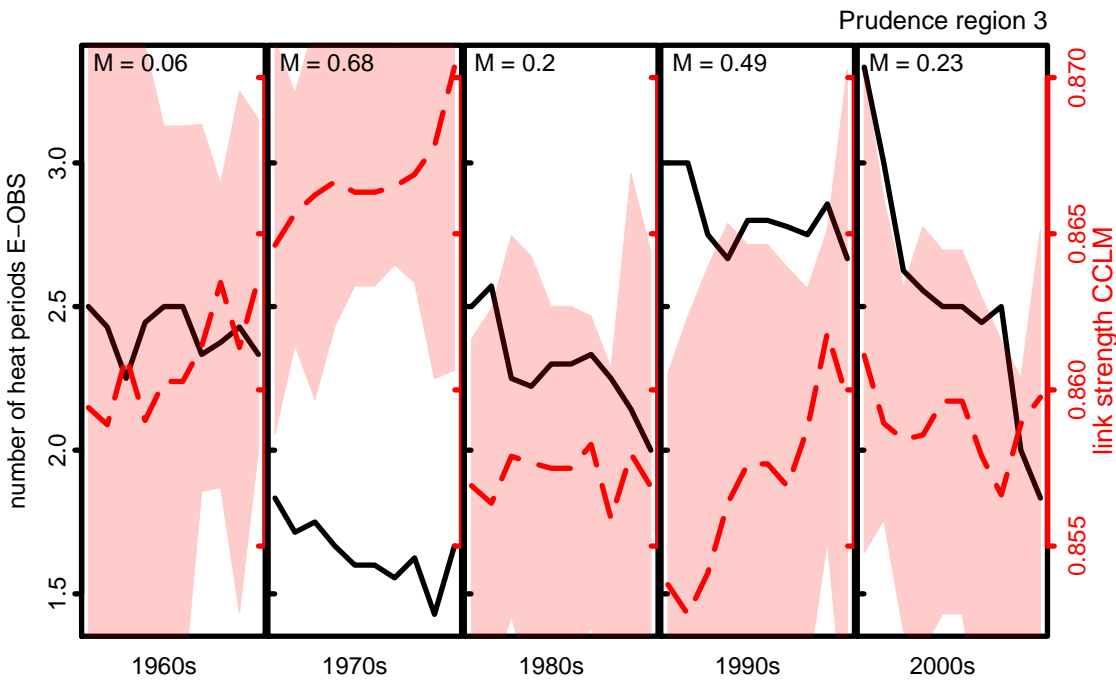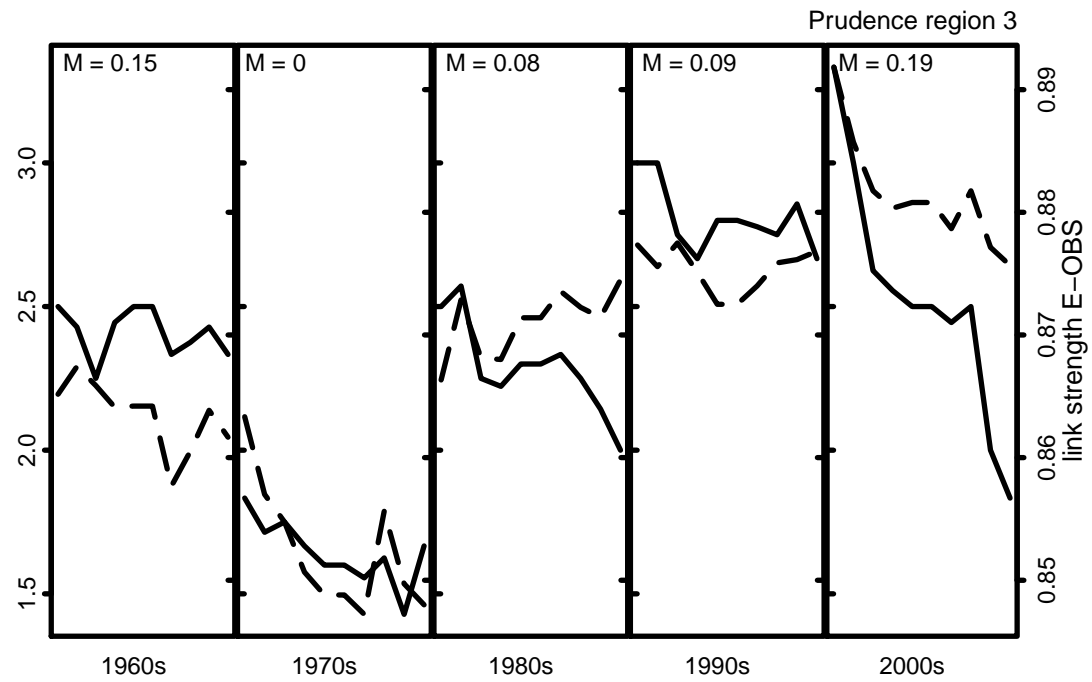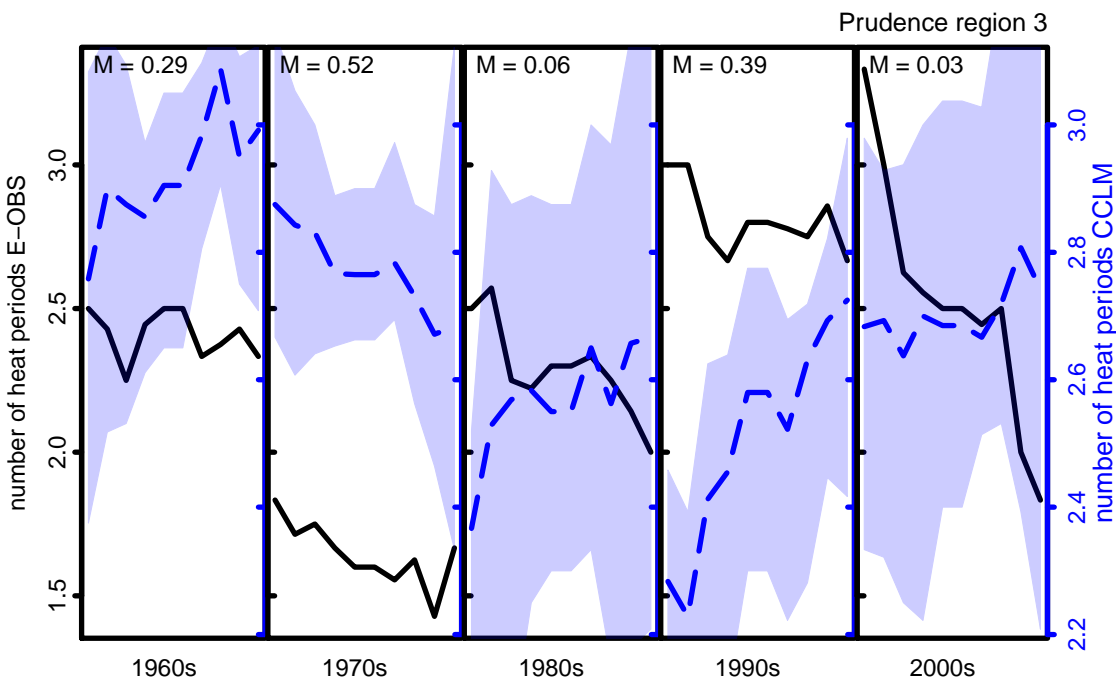

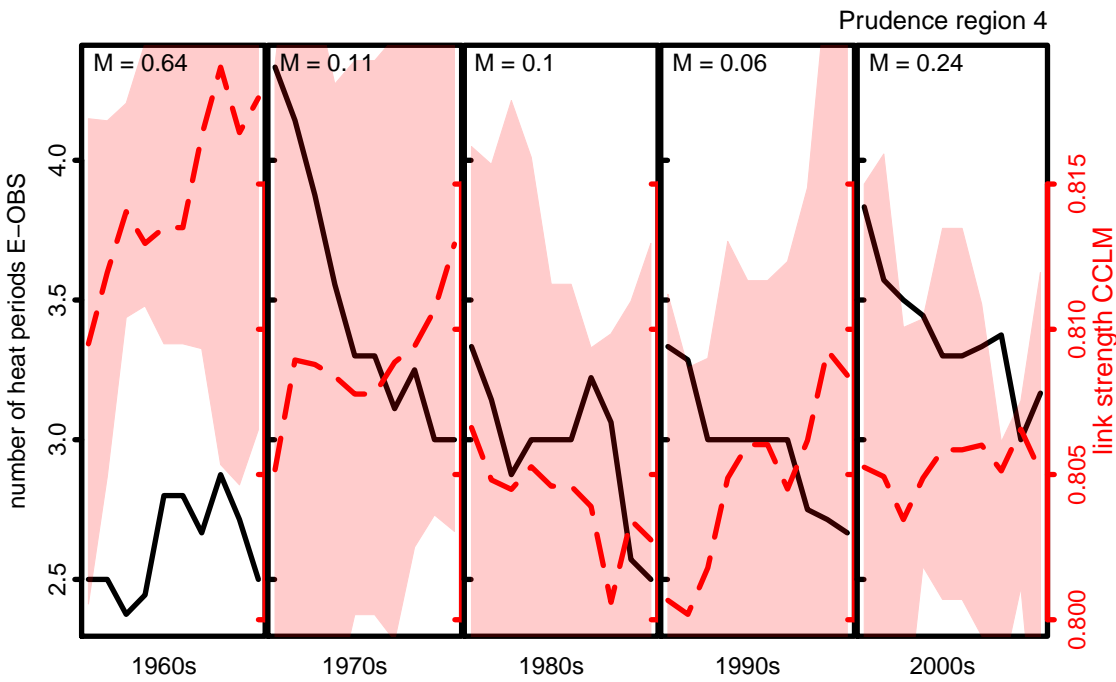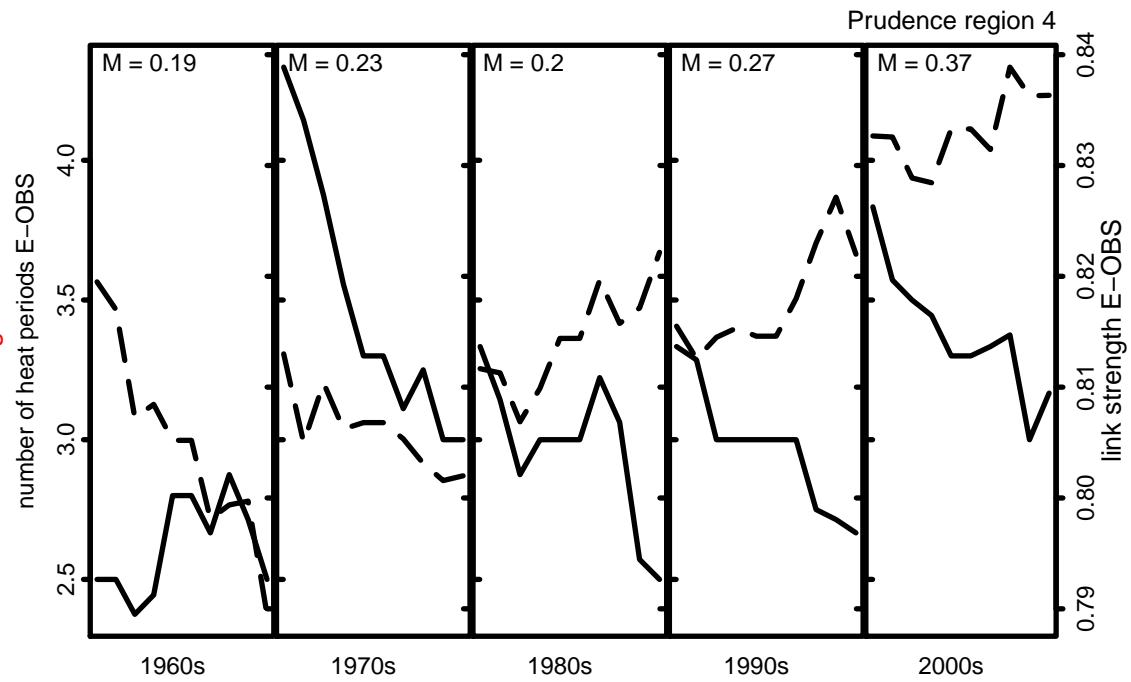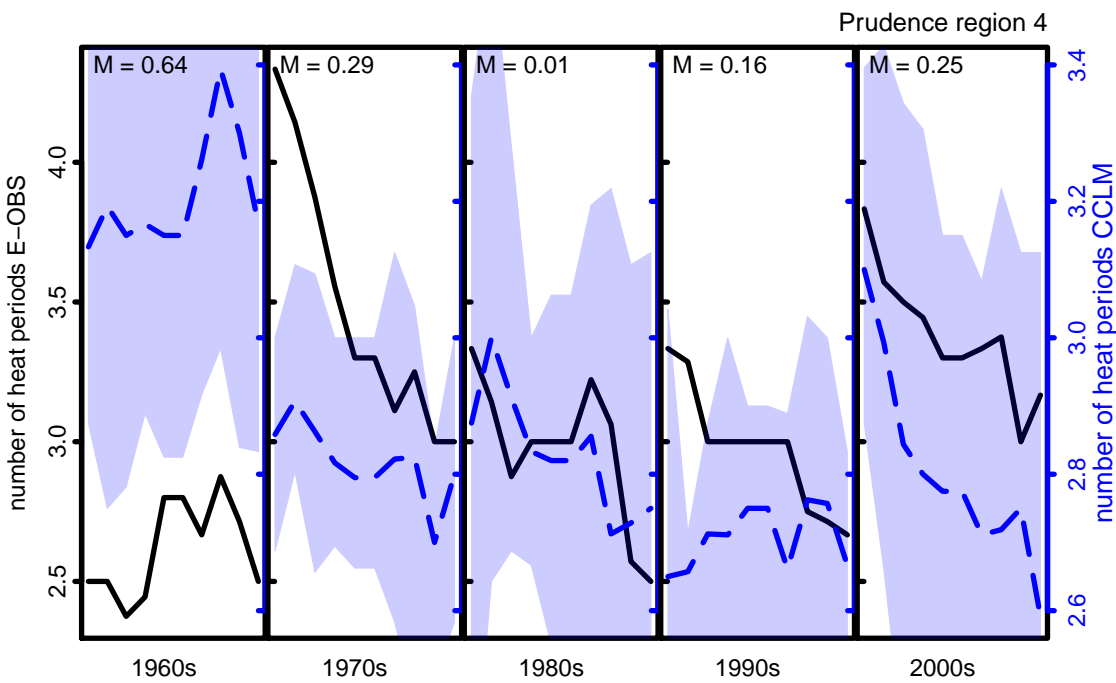

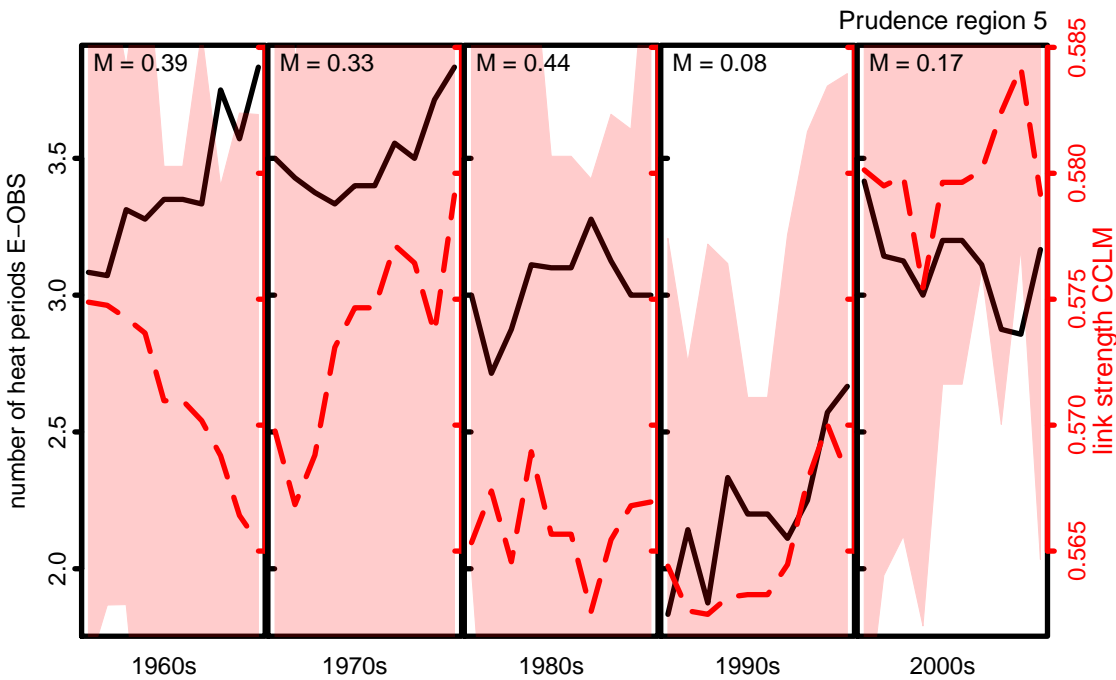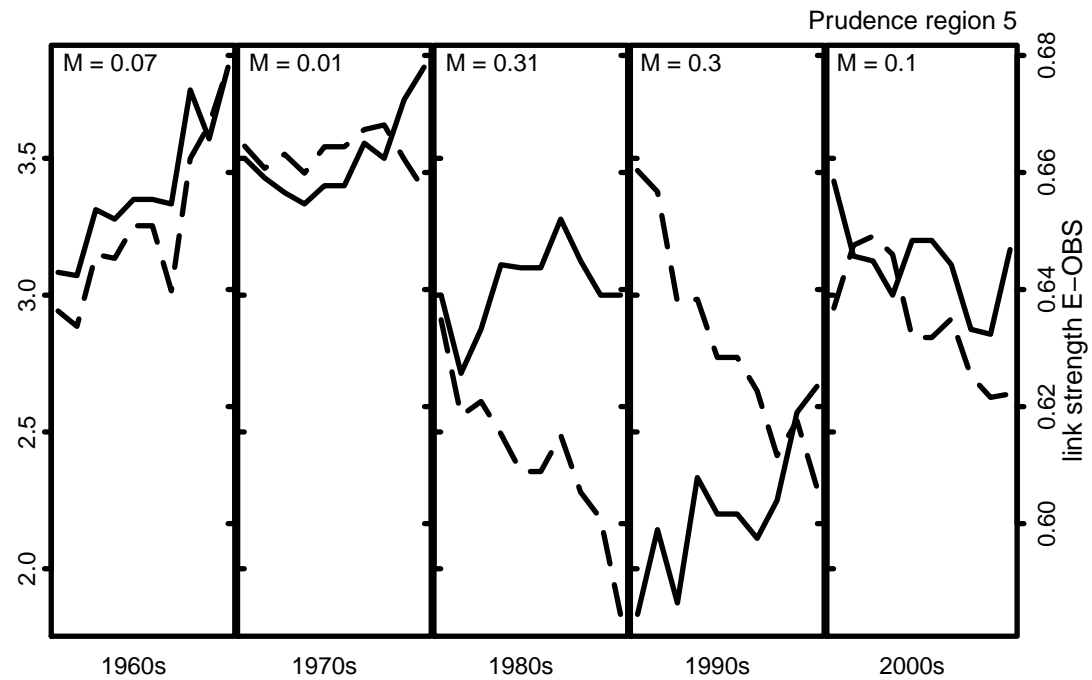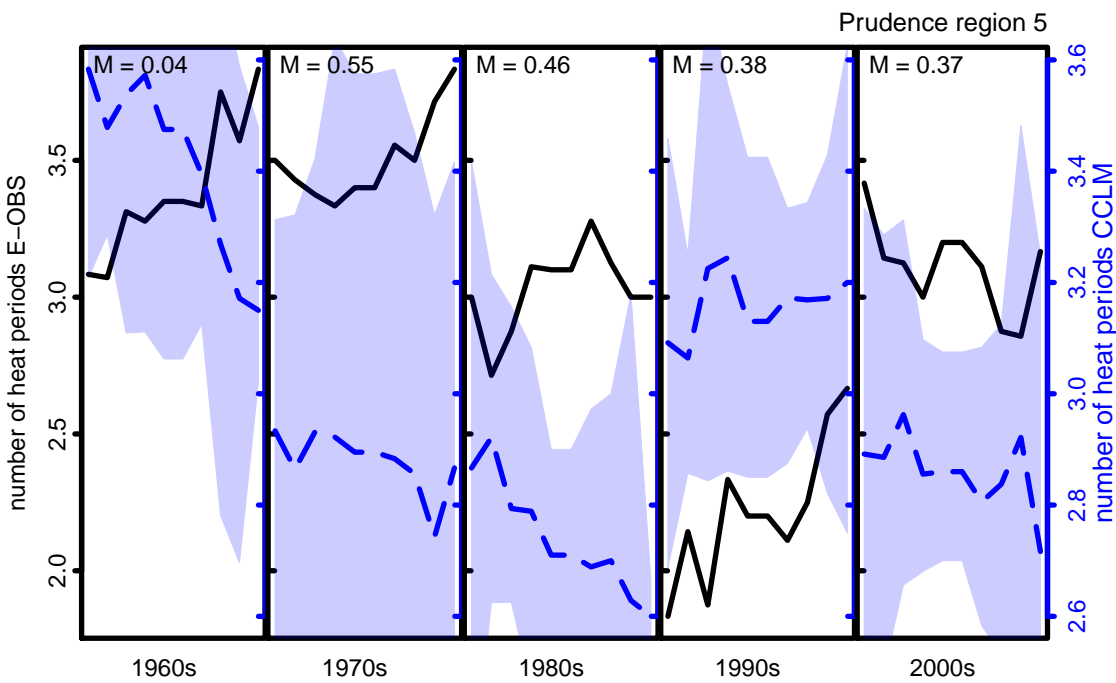

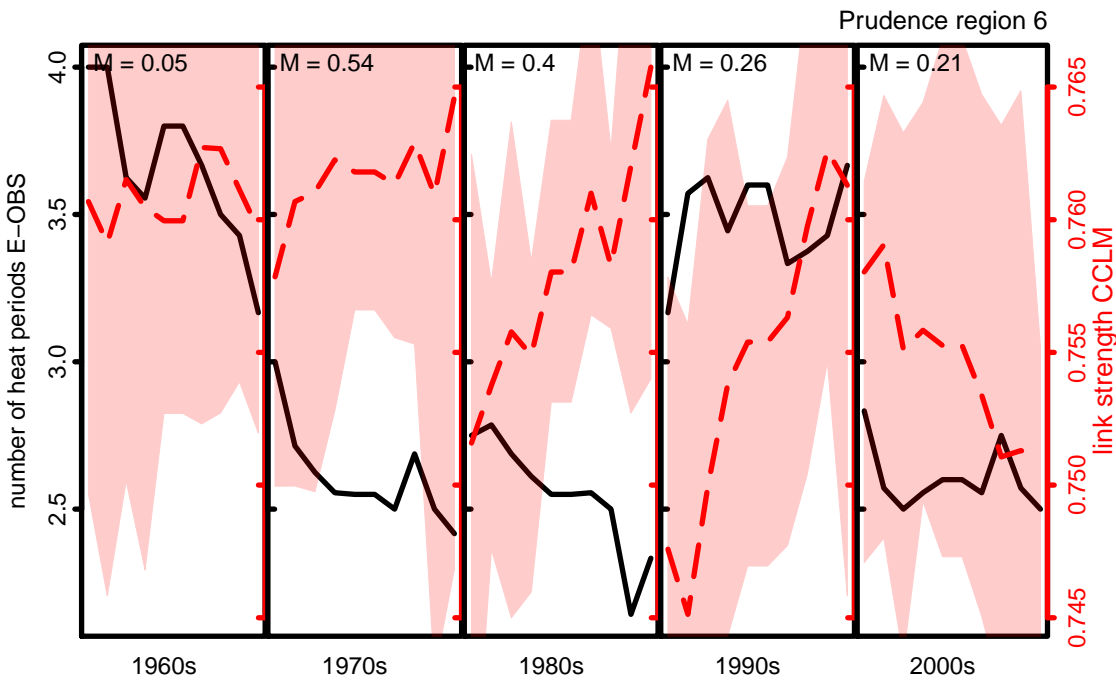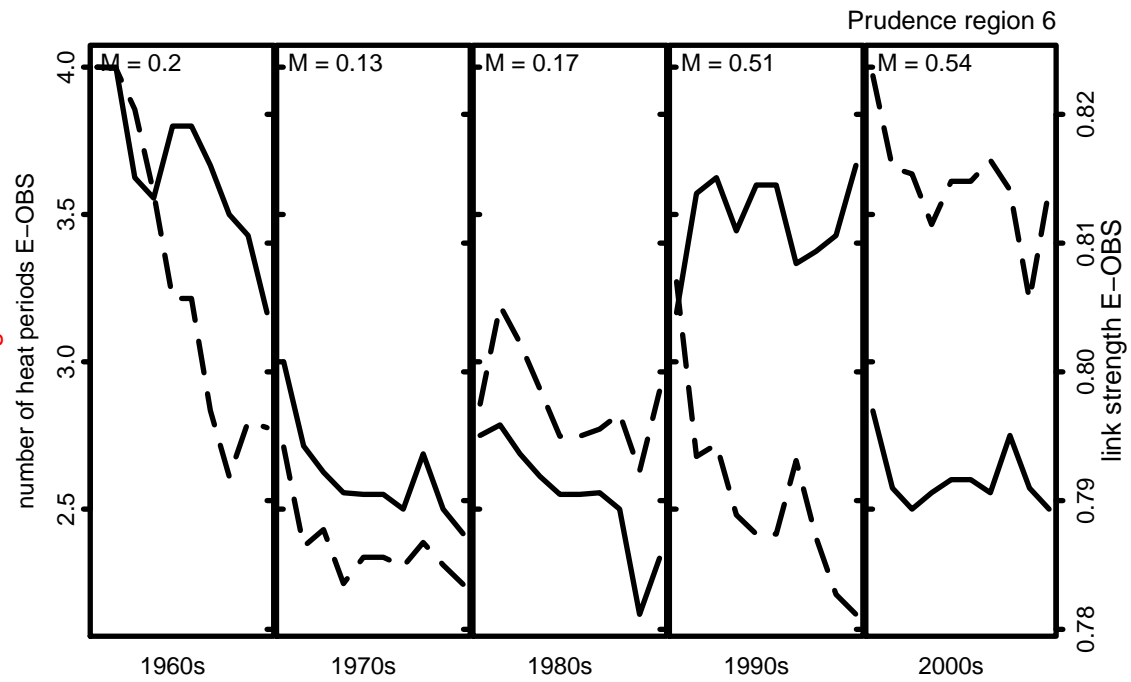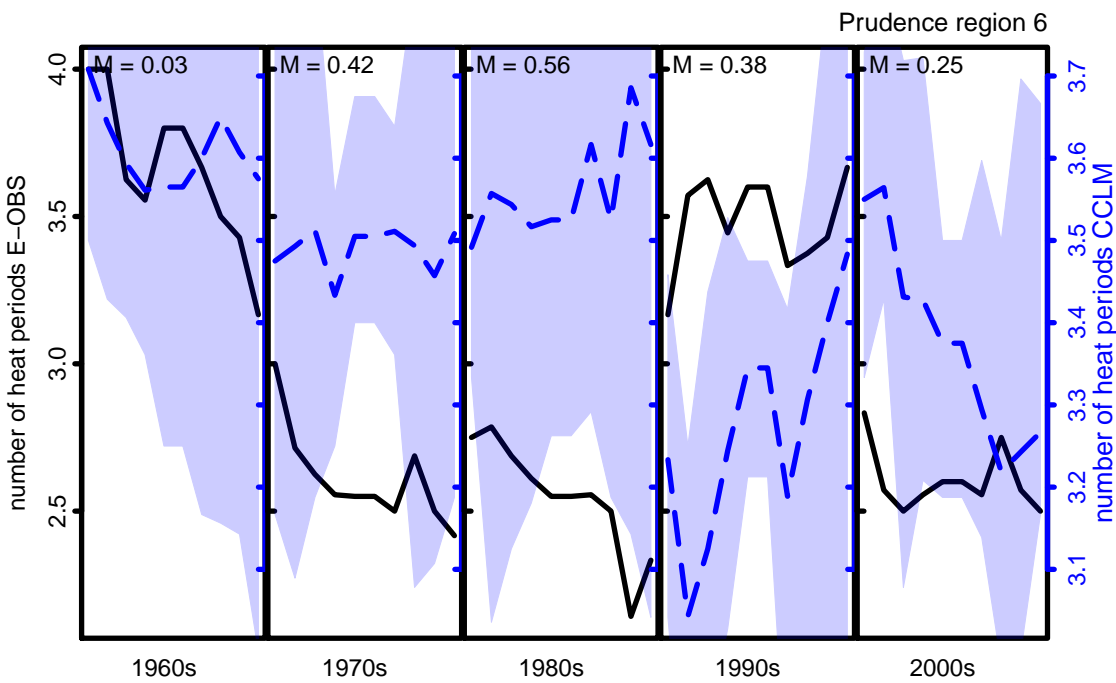



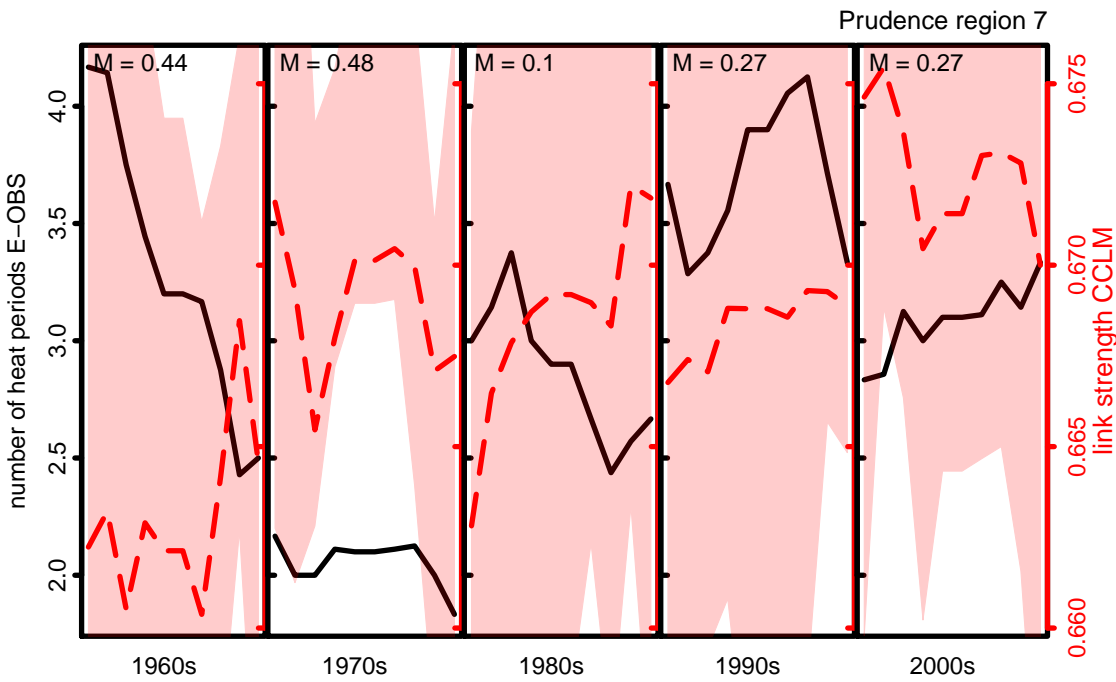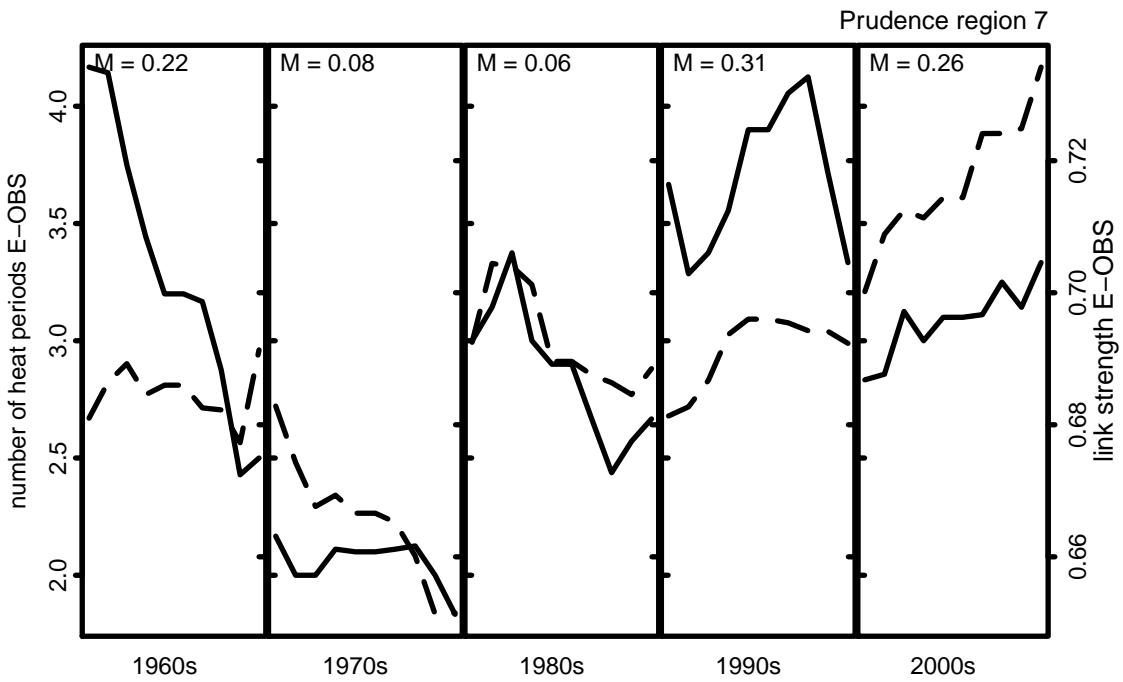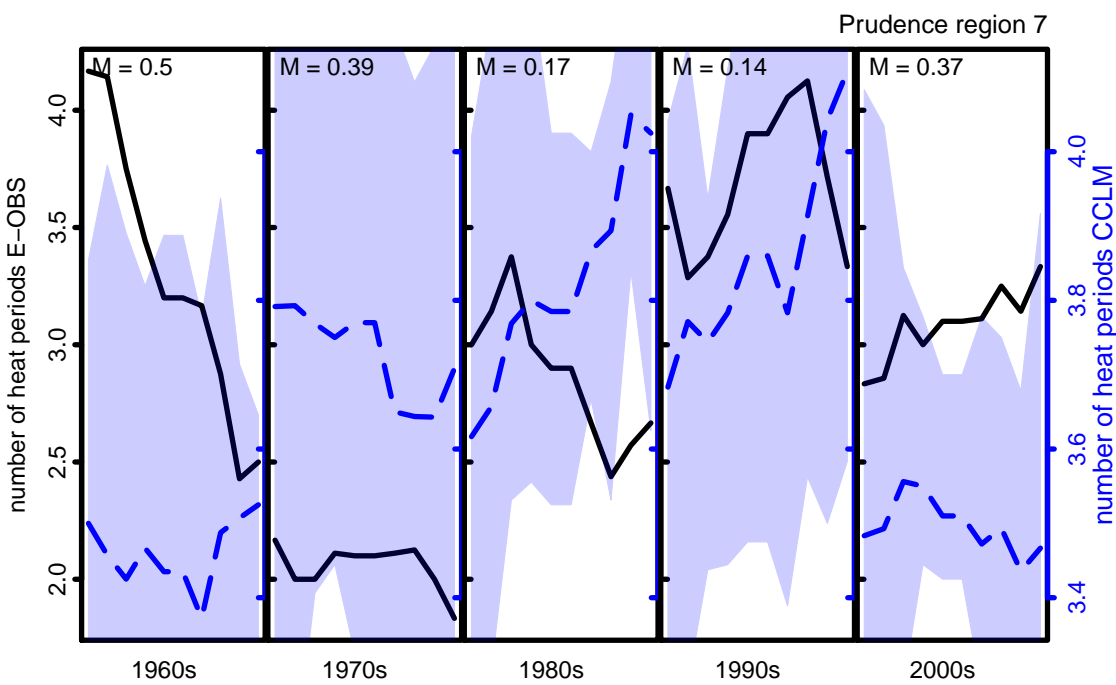

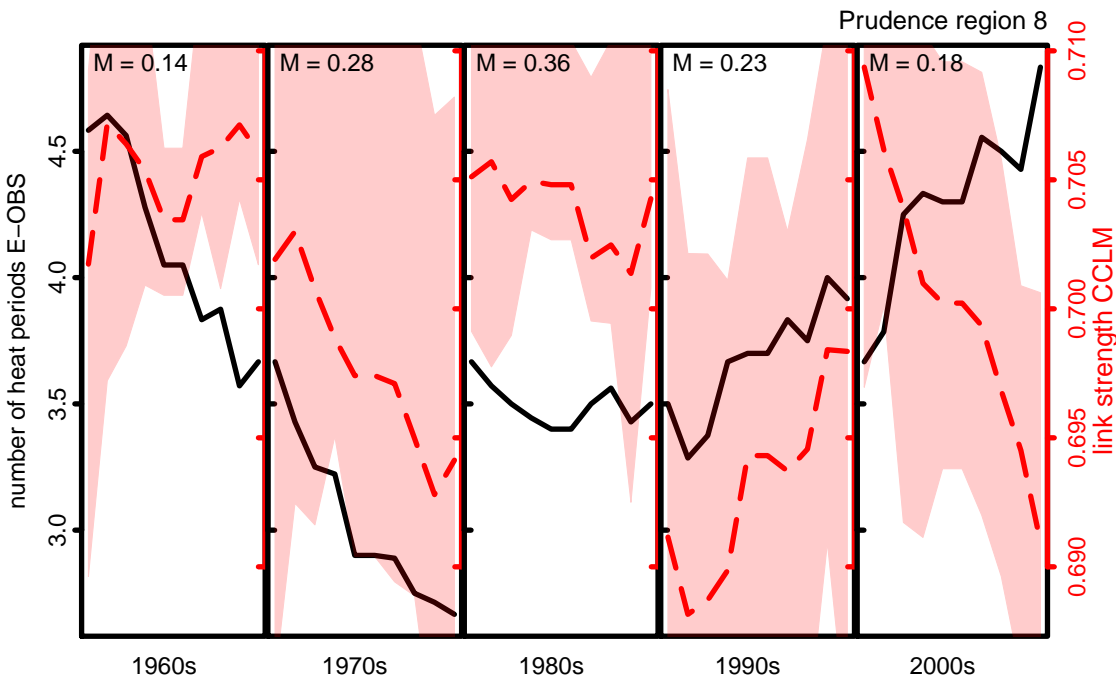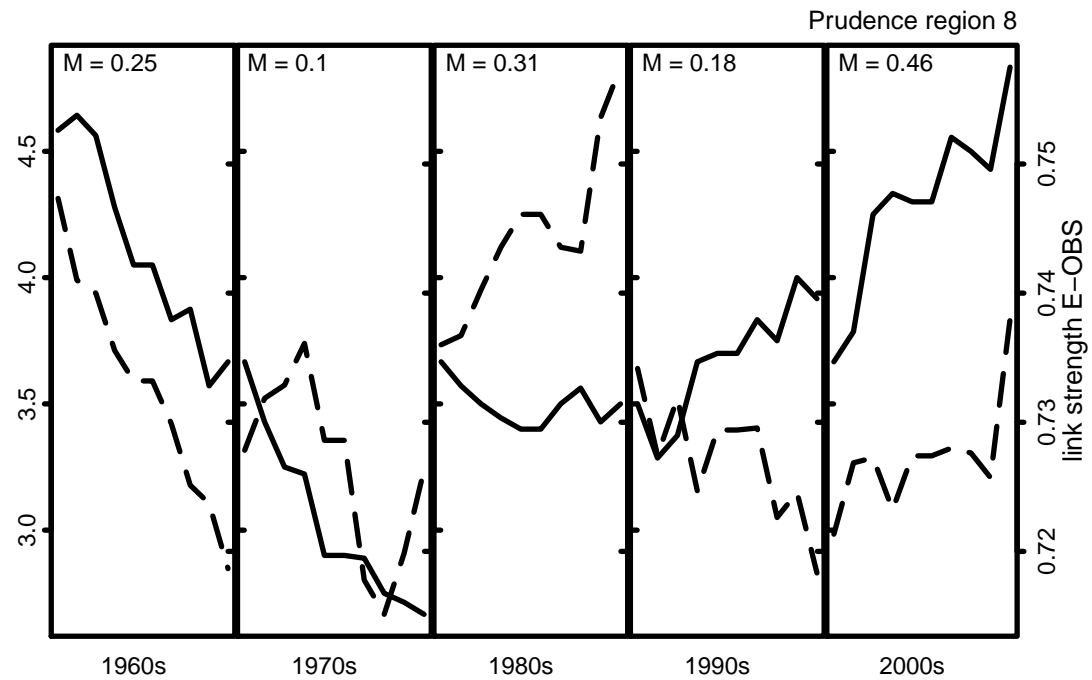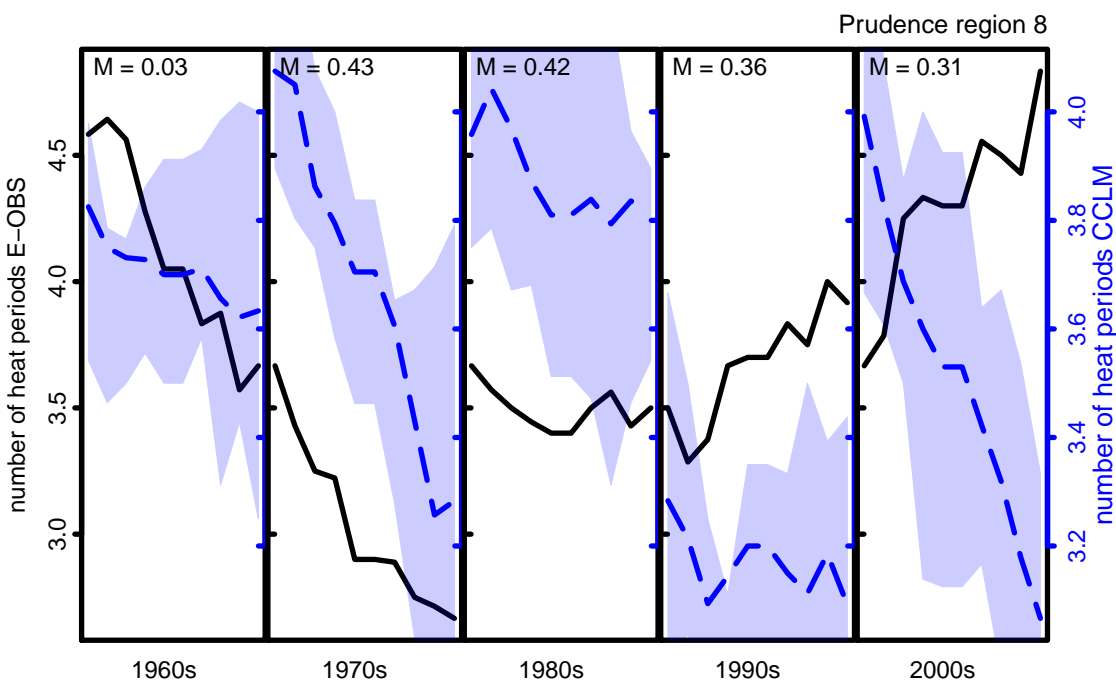

Supplement: Supplementary file 1 [file npg-23-307-2016-supplement.pdf]
